# Supplementary material
Source: HighWire-hosted journal article supplement (https://svn.smart01.highwire.org/content/svn-2024-003320)
Supplement: inline-supplementary-material-1 [file inline-supplementary-material-1.pdf]

Supplementary table 1: Baseline Characteristics of Propensity Score-Matched (PSM) Cohort

| Characteristics                         | General anesthesia<br>(N = 65) | Non-general anesthesia<br>(N = 65) | P value |
|-----------------------------------------|--------------------------------|------------------------------------|---------|
| Age, median (IQR), yr                   | 69 (64-74)                     | 65 (59-73)                         | 0.17    |
| Male sex, no. (%)                       | 38 (58.5)                      | 40 (61.5)                          | 0.72    |
| Medical history, no. (%)                |                                |                                    |         |
| Hypertension                            | 40 (61.5)                      | 44 (67.7)                          | 0.46    |
| Diabetes mellitus                       | 12 (18.5)                      | 15 (23.1)                          | 0.52    |
| Hyperlipidemia                          | 4 (6.2)                        | 5 (7.7)                            | 0.73    |
| Atrial fibrillation                     | 19 (29.2)                      | 12 (18.5)                          | 0.15    |
| Ischemic stroke                         | 9 (13.9)                       | 8 (12.3)                           | 0.79    |
| Coronary heart disease                  | 9 (13.9)                       | 11 (16.9)                          | 0.63    |
| NIHSS score (IQR)                       | 17 (14-20)                     | 16 (14-20)                         | 0.44    |
| ASPECTS value based on CT               |                                |                                    |         |
| Median value (IQR)                      | 3 (3-4)                        | 3 (3-4)                            | 0.93    |
| Distribution, no. (%)                   |                                |                                    | 0.92    |
| 0-2                                     | 11 (16.9)                      | 11 (16.9)                          |         |
| 3                                       | 27 (41.5)                      | 26 (40.0)                          |         |
| 4                                       | 17 (26.2)                      | 20 (30.8)                          |         |
| 5                                       | 10 (15.4)                      | 8 (12.3)                           |         |
| Infarct-core volume, median (IQR), ml   | 66 (29-90)                     | 70 (43-95)                         | 0.59    |
| Penumbra volume, median (IQR), ml       | 182 (144-235)                  | 188 (143-219)                      | 0.84    |
| Prestroke mRS, no. (%)                  |                                |                                    | 0.54    |
| 0                                       | 60 (92.3)                      | 58 (89.2)                          |         |
| 1                                       | 5 (7.7)                        | 7 (10.8)                           |         |
| Baseline SBP, median (IQR), mmHg        | 149 (133-168)                  | 141 (128-163)                      | 0.33    |
| Admission glucose, median (IQR), mmol/L | 7.1 (6.4-8.5)                  | 6.9 (5.9-10.2)                     | 0.86    |
| Intravenous thrombolysis, no. (%)       | 19 (29.2)                      | 22 (33.9)                          | 0.57    |
| Occlusion site, no. (%)                 |                                |                                    | 0.54    |
| ICA                                     | 25 (38.5)                      | 19 (29.2)                          |         |
| M1 segment                              | 39 (60.0)                      | 45 (69.2)                          |         |
| M2 segment                              | 1 (1.5)                        | 1 (1.5)                            |         |
| Stroke classification, no. (%)          |                                |                                    | 0.74    |
| Atherothrombotic                        | 17 (26.2)                      | 16 (24.6)                          |         |
| Cardioembolic                           | 31 (47.7)                      | 28 (43.1)                          |         |
| Undetermined and others                 | 17 (26.2)                      | 21 (32.3)                          |         |

|                                                                 |               |               |      |
|-----------------------------------------------------------------|---------------|---------------|------|
| Interval between onset and hospital arrival, median (IQR), min  | 323 (180-600) | 366 (228-704) | 0.21 |
| Interval between onset and first imaging, median (IQR), min     | 367 (238-677) | 398 (276-734) | 0.40 |
| Onset to randomization                                          |               |               |      |
| Median (IQR), min                                               | 452 (274-697) | 462 (312-778) | 0.44 |
| Distribution, no. (%)                                           |               |               | 0.72 |
| < 6 hr                                                          | 26 (40.0)     | 24 (36.9)     |      |
| 6 to 24 hr                                                      | 39 (60.0)     | 41 (63.1)     |      |
| Interval between onset and puncture, median (IQR), min          | 510 (326-765) | 460 (348-781) | 0.73 |
| Interval between onset and recanalization, median (IQR), min    | 606 (395-856) | 574 (431-876) | 0.62 |
| Interval between puncture and recanalization, median (IQR), min | 78 (52-106)   | 73 (43-115)   | 0.51 |
| Operative time <sup>§</sup> , median (IQR), min                 | 145 (115-185) | 129 (95-180)  | 0.19 |

Abbreviations: IQR=interquartile range; NIHSS=National Institutes of Health Stroke Scale; ASPECTS=Alberta Stroke Program Early CT score; mRS=modified Rankin scale; SBP=systolic blood pressure; ICA=internal carotid artery; M=middle cerebral artery

§ Operative time is defined as the difference between "the time the patient arrives at the catheterization room" and "the time the patient leaves the catheterization room".

**Supplementary table 2:** Sensitivity analysis: general anesthesia vs. non-general anesthesia

|                                                      | Adjusted Model 2 <sup>a</sup>     |         | Adjusted Model 3 <sup>b</sup>     |         |
|------------------------------------------------------|-----------------------------------|---------|-----------------------------------|---------|
|                                                      | Effect size (95% CI) <sup>c</sup> | P-value | Effect size (95% CI) <sup>c</sup> | P-value |
| mRS of 0-2 at 90-day                                 | 0.93 (0.48, 1.80)                 | 0.83    | 1.00 (0.52, 1.91)                 | 0.99    |
| mRS score at 90-day                                  | 0.77 (0.47, 1.26)                 | 0.30    | 0.83 (0.51, 1.36)                 | 0.46    |
| mRS of 0-3 at 90-day                                 | 0.83 (0.45, 1.52)                 | 0.55    | 0.87 (0.47, 1.58)                 | 0.64    |
| 36-hour ΔNIHSS                                       | -2.99 (-5.40, -0.59)              | 0.01    | -2.64 (-5.00, -0.28)              | 0.03    |
| Change from baseline in infarct volume               | 8.14 (-18.75, 35.04)              | 0.55    | 2.29 (-25.00, 29.59)              | 0.87    |
| Successful reperfusion (mTICI 2b-3)                  | 1.27 (0.60, 2.68)                 | 0.53    | 1.08 (0.53, 2.21)                 | 0.84    |
| Pneumonia                                            | 2.13 (1.06, 4.27)                 | 0.03    | 2.03 (1.03, 3.98)                 | 0.04    |
| sICH within 48 hr                                    | 1.27 (0.36, 4.49)                 | 0.71    | 1.18 (0.37, 3.76)                 | 0.78    |
| Any ICH within 48 hr                                 | 0.99 (0.56, 1.75)                 | 0.98    | 0.93 (0.53, 1.63)                 | 0.80    |
| Death within 90-day                                  | 1.67 (0.83, 3.36)                 | 0.15    | 1.50 (0.76, 2.99)                 | 0.25    |
| Decompressive hemicraniectomy during hospitalization | 1.66 (0.54, 5.06)                 | 0.38    | 1.71 (0.58, 5.01)                 | 0.33    |
| Any procedural complications                         | 1.48 (0.52, 4.24)                 | 0.46    | 1.30 (0.46, 3.65)                 | 0.62    |

<sup>a</sup> Adjusted for age, pre-stroke mRS score, baseline NIHSS score, baseline ASPECTS, core infarct volume, time from onset to puncture, and receipt of intravenous thrombolysis in the per-protocol population.

<sup>b</sup> Adjusted for age, pre-stroke mRS score, baseline NIHSS score, baseline ASPECTS, core infarct volume, time from onset to puncture, receipt of intravenous thrombolysis and operation time in the intention-to-treat population.

<sup>c</sup> The results of the binary logistic regression are reported as OR with 95% CI, those of the linear regression as  $\beta$  with 95% CI, and those of the ordinal logistic regression as cOR with 95% CI. Abbreviations: aOR=adjusted odds ratio; mRS=modified Rankin Scale; NIHSS=National Institutes of Health Stroke Scale; mTICI=modified thrombolysis in cerebral infarction; ICH=intracranial hemorrhage; sICH=symptomatic intracranial hemorrhage

**Supplementary Figure 1: Probability Density Plots Pre- and Post- Propensity Score Matching (PSM)**

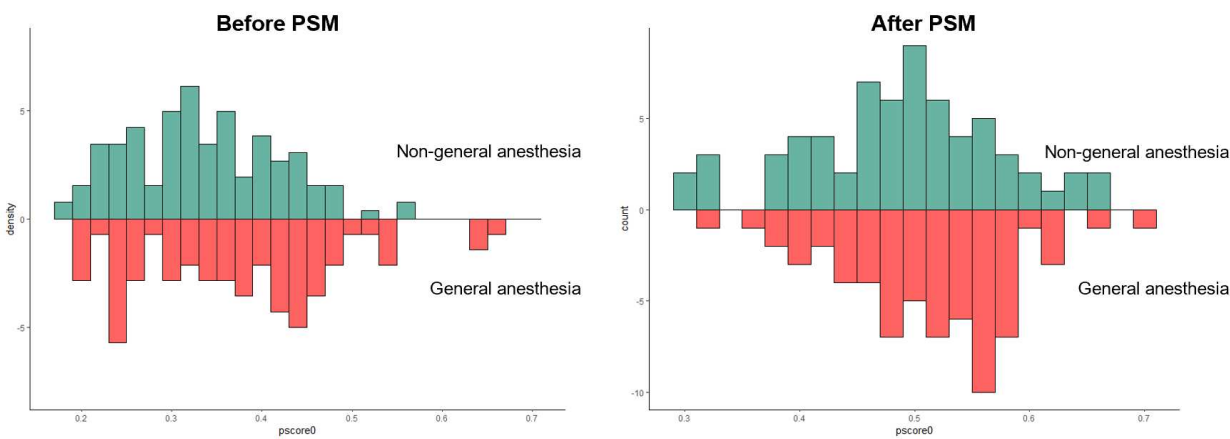

**Supplementary Figure 2:** Systolic blood pressure (SBP) at critical time points in the PSM cohort

A. After groin puncture

B. After final angiography

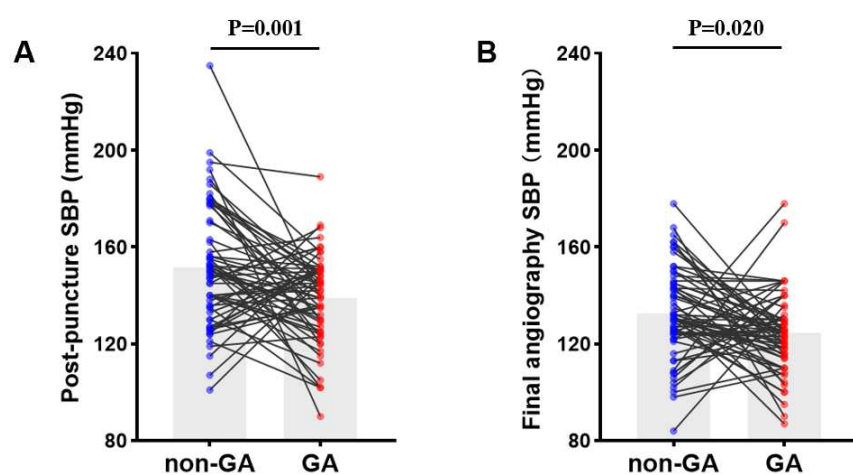

The ANGEL-ASPECT Study Group

| Hospital / Institution                                                       | Researchers                                                                                                                                                                                                                                                                                                                                                       |
|------------------------------------------------------------------------------|-------------------------------------------------------------------------------------------------------------------------------------------------------------------------------------------------------------------------------------------------------------------------------------------------------------------------------------------------------------------|
| Beijing Tiantan Hospital, Capital Medical University                         | Zhongrong Miao (PI), Yongjun Wang, Yilong Wang, Xingquan Zhao, Liping Liu, Jing Jing, Zhe Zhang, Yingkui Zhang, Dapeng Sun, Zhongqi Qi, Shuo Li, Zhenqiang Liu, Zequan Yu, Jingyu Zhang, Fangguang Chen, Kangyue Li, Kai Zhang, Mingkai Hu, Xiaochuan Huo, Gaoting Ma, Xu Tong, Xuelei Zhang, Yuesong Pan, Aoming Jin, Xianglong Xiang, Mengxing Wang, Hongyi Yan |
| Xuanwu Hospital, Capital Medical University                                  | Xunming Ji                                                                                                                                                                                                                                                                                                                                                        |
| Huashan Hospital, Fudan University                                           | Qiang Dong, Kun Fang, Yi Dong                                                                                                                                                                                                                                                                                                                                     |
| The First Affiliated Hospital, Jinan University                              | Anding Xu                                                                                                                                                                                                                                                                                                                                                         |
| Affiliated Jinling Hospital, Medical School of Nanjing University            | Xinfeng Liu                                                                                                                                                                                                                                                                                                                                                       |
| Xinqiao Hospital and The Second Affiliated Hospital, Army Medical University | Qingwu Yang                                                                                                                                                                                                                                                                                                                                                       |
| Qilu Hospital, Shandong University                                           | Wei Wu                                                                                                                                                                                                                                                                                                                                                            |
| Changhai Hospital, Naval Medical University                                  | Jianmin Liu, Pengfei Yang                                                                                                                                                                                                                                                                                                                                         |
| Peking University First Hospital                                             | Chen Yao                                                                                                                                                                                                                                                                                                                                                          |
| The Southwest Hospital of Army Medical University                            | Kangning Chen                                                                                                                                                                                                                                                                                                                                                     |
| The First Affiliated Hospital of Zhengzhou University                        | Bo Song                                                                                                                                                                                                                                                                                                                                                           |
| University of California at Los Angeles                                      | David S. Liebeskind                                                                                                                                                                                                                                                                                                                                               |
| St Michael's Hospital, University of Toronto                                 | Vitor Mendes Pereira                                                                                                                                                                                                                                                                                                                                              |
| Boston Medical Center                                                        | Thanh N. Nguyen                                                                                                                                                                                                                                                                                                                                                   |
| Xiangtan Central Hospital                                                    | Guangxiong Yuan (PI)                                                                                                                                                                                                                                                                                                                                              |
| Linyi People's Hospital                                                      | Hongxing Han (PI)                                                                                                                                                                                                                                                                                                                                                 |
| Zhangzhou Affiliated Hospital of Fujian Medical University                   | Wenhuo Chen (PI)                                                                                                                                                                                                                                                                                                                                                  |
| Tianjin huanhu hospital                                                      | Ming Wei (PI)                                                                                                                                                                                                                                                                                                                                                     |
| Anyang People's Hospital                                                     | Jiangang Zhang (PI)                                                                                                                                                                                                                                                                                                                                               |
| Yijishan Hospital of Wannan Medical College                                  | Zhiming Zhou (PI)                                                                                                                                                                                                                                                                                                                                                 |
| The first people's hospital of Chenzhou                                      | Xiaoxi Yao (PI)                                                                                                                                                                                                                                                                                                                                                   |
| Bin zhou People's Hospital                                                   | Guoqing Wang (PI)                                                                                                                                                                                                                                                                                                                                                 |
| Yancheng Third People's Hospital                                             | Weigen Song (PI)                                                                                                                                                                                                                                                                                                                                                  |
| Lishui Municipal Central Hospital                                            | Xueli Cai (PI)                                                                                                                                                                                                                                                                                                                                                    |
| China-Japan Union Hospital of Jilin University                               | Guangxian Nan (PI)                                                                                                                                                                                                                                                                                                                                                |
| Dalian Municipal Central Hospital affiliated with Dalian Medical University  | Di Li (PI)                                                                                                                                                                                                                                                                                                                                                        |
| Guangdong Provincial Hospital of Chinese Medicine                            | Yizhou Wang (PI)                                                                                                                                                                                                                                                                                                                                                  |
| ZhongShan City People's Hospital                                             | Wentong Ling (PI)                                                                                                                                                                                                                                                                                                                                                 |
| Shantou Central Hospital                                                     | Chuwei Cai (PI)                                                                                                                                                                                                                                                                                                                                                   |
| Nanyang Central Hospital                                                     | Changming Wen (PI)                                                                                                                                                                                                                                                                                                                                                |
| Taizhou hospital of Zhejiang Province                                        | En Wang (PI)                                                                                                                                                                                                                                                                                                                                                      |
| Liaocheng People's Hospital                                                  | Liyong Zhang (PI)                                                                                                                                                                                                                                                                                                                                                 |
| Baotou Centre Hospital                                                       | Changchun Jiang (PI)                                                                                                                                                                                                                                                                                                                                              |

|                                                                                     |                                                                                                                                                                                                                                      |
|-------------------------------------------------------------------------------------|--------------------------------------------------------------------------------------------------------------------------------------------------------------------------------------------------------------------------------------|
| Shenzhen Hospital, Southern Medical University                                      | Yajie Liu (PI)                                                                                                                                                                                                                       |
| Maoming People's Hospital                                                           | Geng Liao (PI)                                                                                                                                                                                                                       |
| The Second Affiliated Hospital of GuangZhou Medical University                      | Xiaohui Chen (PI)                                                                                                                                                                                                                    |
| Henan Provincial People's Hospital, Zhengzhou University                            | Tianxiao Li (PI)                                                                                                                                                                                                                     |
| Yongchuan Hospital of Chongqing Medical University                                  | Shudong Liu (PI)                                                                                                                                                                                                                     |
| The affiliated hospital of South West Medical University                            | Jinglun Li (PI)                                                                                                                                                                                                                      |
| Shanxi Provincial People's Hospital                                                 | Yaxuan Sun (PI)                                                                                                                                                                                                                      |
| The Second Affiliated Hospital to Xiamen Medical College                            | Na Xu (PI)                                                                                                                                                                                                                           |
| Shengli Oilfield Central Hospital                                                   | Zong'en Gao (PI)                                                                                                                                                                                                                     |
| Songyuan Jilin oil Field Hospital                                                   | Dongsheng Ju (PI)                                                                                                                                                                                                                    |
| Liao Cheng the third people's hospital                                              | Cunfeng Song (PI)                                                                                                                                                                                                                    |
| The First People's Hospital of Changzhou                                            | Jinggang Xuan (PI)                                                                                                                                                                                                                   |
| Taiyuan Central Hospital                                                            | Feng Zhou (PI)                                                                                                                                                                                                                       |
| Affiliated Jiangmen Traditional Chinese Medicine Hospital of Ji'nan University      | Qing Shi (PI)                                                                                                                                                                                                                        |
| Sichuan Mianyang 404 Hospital                                                       | Jun Luo (PI)                                                                                                                                                                                                                         |
| JingJiang People's Hospital, the Seventh Affiliated Hospital of Yangzhou University | Yan Liu (PI)                                                                                                                                                                                                                         |
| Tianjin TEDA Hospital                                                               | Zaiyu Guo (PI)                                                                                                                                                                                                                       |
| The second Nanning People's Hospital                                                | Tong Li (PI)                                                                                                                                                                                                                         |
| West China Hospital, Sichuan University                                             | Hongbo Zheng (PI)                                                                                                                                                                                                                    |
| First Affiliated Hospital School of Medicine Shihezi University                     | Linshi Dai (PI)                                                                                                                                                                                                                      |
| Siping Central People's Hospital                                                    | Junfeng Zhao (PI)                                                                                                                                                                                                                    |
| Langfang Changzheng Hospital                                                        | Liqiang Gui (PI)                                                                                                                                                                                                                     |
| Beijing Luhe Hospital, Capital Medical University                                   | Xiaokun Geng (PI)                                                                                                                                                                                                                    |
| Mianyang Central Hospital                                                           | Yufeng Tang (PI)                                                                                                                                                                                                                     |
| Hangzhou First People's Hospital                                                    | Congguo Yin (PI)                                                                                                                                                                                                                     |
| The Affiliated Hospital of Guizhou Medical University                               | Hua Yang (PI), Zeguang Ren                                                                                                                                                                                                           |
| Ericure Medical Technology. Co., Ltd.                                               | Ruiyang An, Yuying Sun, Yanan Wu, Chunlai Yu, Shuangcheng Zheng                                                                                                                                                                      |
| Blueballoon Medical Research Co. LTD                                                | Yuanling He, Chunyang Li, Weixia Kong                                                                                                                                                                                                |
| Wisemed Medical Technology. Co., Ltd.                                               | Yuhuan Chen, Chenhao Guo, Fengjie Ji, Pengshan Ji, Lei Liu, Xinghua Lu, Guangkuo Luo, Nanjing Wang, Yu Zhang, Bo Liu, Jian Yang, Jingjing Deng, Juan Wang, Wanru Wang, Hang Yu, Le Cui, Wenwen Liu, Ziyong Wang, Xia Zhao, Zhou Zhou |
